# Supplementary material for: Machine learning unravels inherent structural patterns in Escherichia coli Hi-C matrices and predicts chromosome dynamics
Source: PubMed Central journal article supplement — Nucleic Acids Res. 2024 Sep 1;52(18):10836–49. doi: 10.1093/nar/gkae749 (PMC11472170; doi:10.1093/nar/gkae749), 2024-09-01
Supplement: gkae749_supplemental_file.pdf [file gkae749_supplemental_file.pdf]

## Supplementary Information

(Machine Learning Unravels Inherent Structural Patterns  
in *Escherichia coli* Hi-C Matrices and Predicts DNA  
Dynamics)

Palash Bera, and Jagannath Mondal

## 0.1 Confusion Matrix

In Figure 1, we present the tabular representation of the confusion matrix. In this context, we have computed various classification metrics applicable to both binary and multi-class systems.

|        |          | Predicted                  |                            |
|--------|----------|----------------------------|----------------------------|
|        |          | Positive                   | Negative                   |
| Actual | Positive | <b>True Positive (TP)</b>  | <b>False Negative (FN)</b> |
|        | Negative | <b>False Positive (FP)</b> | <b>True Negative (TN)</b>  |

Figure 1: The architecture of the confusion matrix. The various classification metrics such as Accuracy, Precision, Recall, and F1-Score can be derived from this confusion matrix.

|        |   | Predicted |          |          |          |          |          |
|--------|---|-----------|----------|----------|----------|----------|----------|
|        |   | A         | B        | C        | D        | E        | F        |
| Actual | A | $TP_A$    | $E_{AB}$ | $E_{AC}$ | $E_{AD}$ | $E_{AE}$ | $E_{AF}$ |
|        | B | $E_{BA}$  | $TP_B$   | $E_{BC}$ | $E_{BD}$ | $E_{BE}$ | $E_{BF}$ |
|        | C | $E_{CA}$  | $E_{CB}$ | $TP_C$   | $E_{CD}$ | $E_{CE}$ | $E_{CF}$ |
|        | D | $E_{DA}$  | $E_{DB}$ | $E_{DC}$ | $TP_D$   | $E_{DE}$ | $E_{DF}$ |
|        | E | $E_{EA}$  | $E_{EB}$ | $E_{EC}$ | $E_{ED}$ | $TP_E$   | $E_{EF}$ |
|        | F | $E_{FA}$  | $E_{FB}$ | $E_{FC}$ | $E_{FD}$ | $E_{FE}$ | $TP_F$   |

Table 1: **Confusion matrix for six class system**

Various classification metrics are commonly defined as follows:

$$\text{Accuracy} = \frac{TP + TN}{TP + TN + FP + FN}$$

$$\text{Precision} = \frac{TP}{TP + FP}$$

$$\text{Recall} = \frac{TP}{TP + FN}$$

$$\text{F1-Score} = 2 \times \frac{\text{Precision} \times \text{Recall}}{\text{Precision} + \text{Recall}}$$

For many class system, one can define the overall Accuracy, class wise Precision, Recall, and F1-Score as follows:

$$\text{Accuracy} = \frac{\text{Total correct classification}}{\text{All classification}} = \frac{TP_A + TP_B + TP_C + TP_D + TP_E + TP_F}{TP_A + TP_B + TP_C + TP_D + TP_E + TP_F + E_{AB} + \dots + E_{FE}}$$

$$P_A = \frac{TP_A}{TP_A + E_{BA} + E_{CA} + E_{DA} + E_{EA} + E_{FA}}$$

⋮

$$P_F = \frac{TP_F}{TP_F + E_{AF} + E_{BF} + E_{CF} + E_{DF} + E_{EF}}$$

$$R_A = \frac{TP_A}{TP_A + E_{AB} + E_{AC} + E_{AD} + E_{AE} + E_{AF}}$$

⋮

$$R_F = \frac{TP_F}{TP_F + E_{FA} + E_{FB} + E_{FC} + E_{FD} + E_{FE}}$$

$$\text{F1-Score}_A = 2 \times \frac{P_A \times R_A}{P_A + R_A}$$

⋮

$$\text{F1-Score}_F = 2 \times \frac{P_F \times R_F}{P_F + R_F}$$

Here  $P_A \dots P_F$ ,  $R_A \dots R_F$ ,  $\text{F1-Score}_A \dots \text{F1-Score}_F$  represent the Precision, Recall, and F1-Score for different classes respectively.

**SR1: Robustness of the Random Forest Regression:** Within the context of Random Forest regression, two key hyperparameters play a pivotal role: (i) the number of trees in the forest, denoted as `n_estimators` in machine learning terminology, and (ii) the minimum number of samples required in the leaf node of the trees, referred to as `min_samples_leaf`. In the preceding section, all the discussed results were based on `n_estimators = 500` and `min_samples_leaf = 1`. To comprehensively assess the impact of altering these hyperparameters, we systematically varied their values. Figures S1(a) and (b) illustrate the variation of the PCC as a function of time for different `n_estimators` and `min_samples_leaf`, respectively. These figures reveal that the PCC is not varied too much with different choices of hyperparameters, underscoring the robustness of our model, particularly with the selected parameter set (`n_estimators = 500` and `min_samples_leaf = 1`).

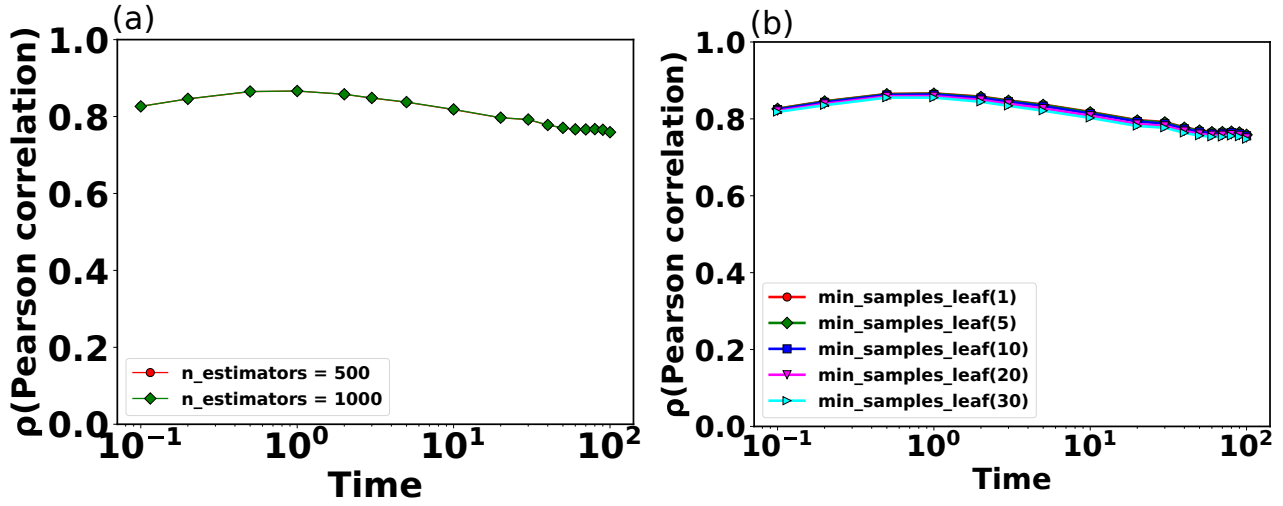

Figure S1: **Robustness of Random Forest (RF) regression.** The Pearson Correlation Coefficient (PCC) is depicted as a function of time for varying values of (a) `n_estimators` and (b) `min_samples_leaf`, respectively. Notably, our RF regression model has been configured with (`n_estimators = 500` and `min_samples_leaf = 1`). The PCC exhibits minimal variation across different choices of these hyperparameters, suggesting the robustness of our model, especially within the chosen parameter set. In all the plots, the time is expressed in terms of  $\tau_{BD}$ .

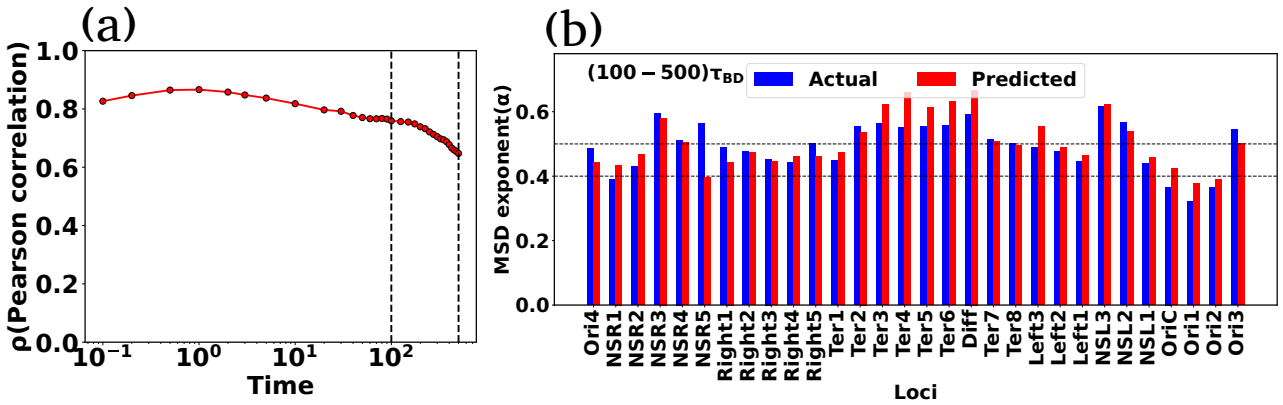

Figure S2: (a) Pearson Correlation Coefficient (PCC) between actual and predicted MSDs a function of time. (b) Comparison of the MSD exponents between observed and predicted values at large time.

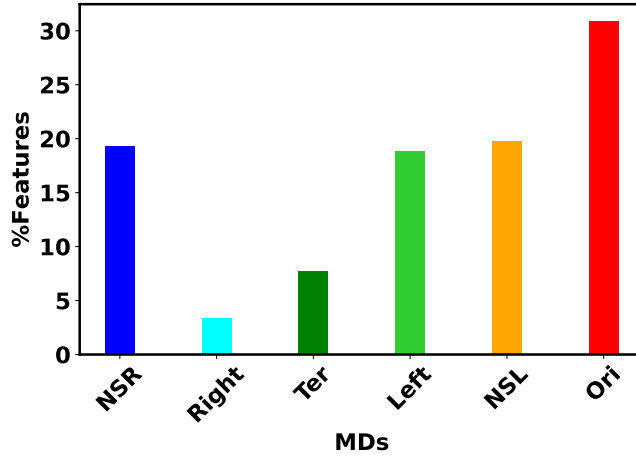

Figure S3: The bar plot of the percentage-wise contributions of common *top features* with respect to different macrodomains. Notably, Ori MD exhibits a predominant share of *top features*, while Right MD showcases a comparatively smaller proportion of these common *top features*.

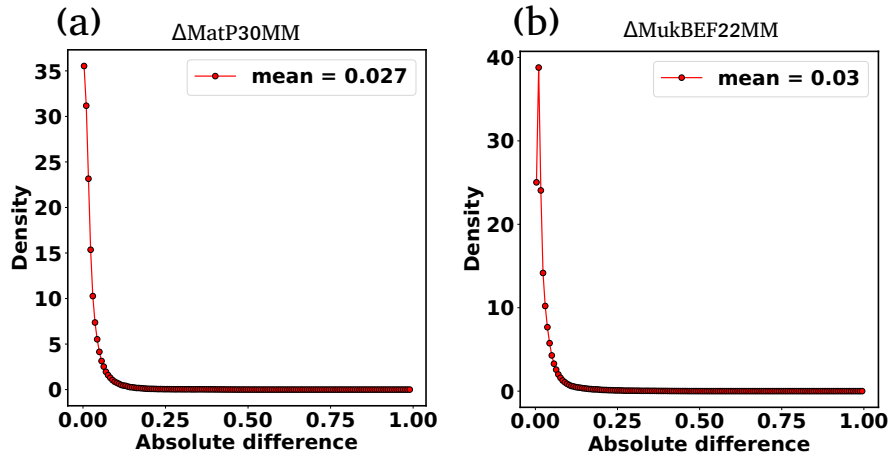

Figure S4: (a) The distribution of the absolute difference between the experimental and ML-recreated contact probability matrices for  $\Delta\text{MatP30MM}$ . (b) The distribution of the absolute difference between the experimental and ML-recreated contact probability matrices for  $\Delta\text{MukBEF22MM}$ .

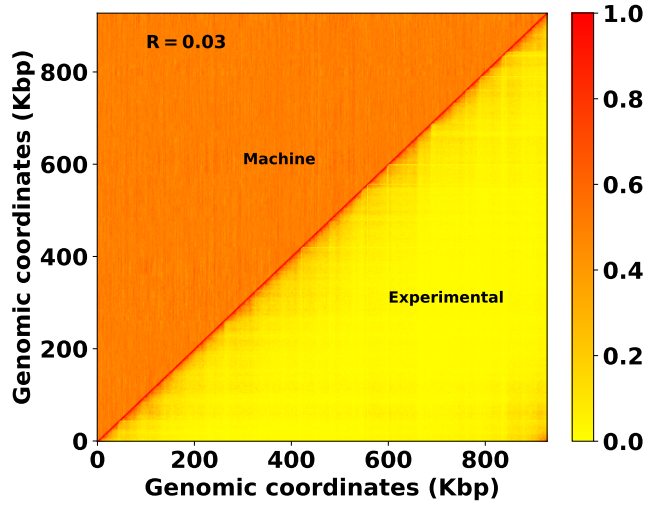

Figure S5: Comparison of experimental and ML recreated Hi-C matrix for  $\Delta\text{MatP30MM}$ . We recreated the Hi-C matrix using the trained model on random matrix. The notably low value of the Pearson Correlation Coefficient (PCC) implies a poor recreation.

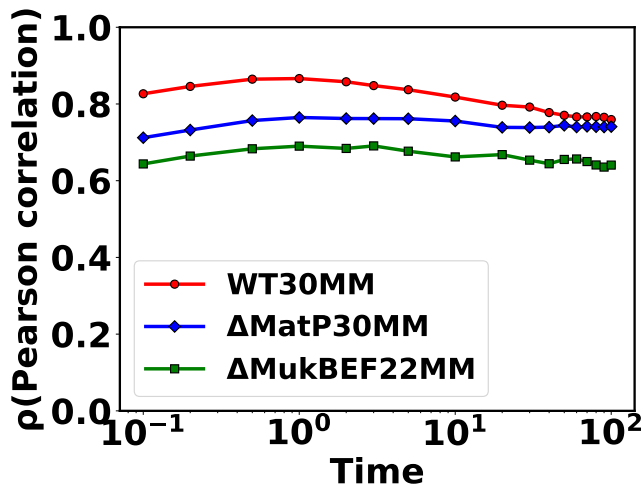

Figure S6: Pearson correlation coefficient (PCC) ( $\rho$ ) between actual and predicted mean squared displacements (MSDs) over time for both WT and mutants ( $\Delta\text{MatP30MM}$  and  $\Delta\text{MukBEF22MM}$ ) chromosomes.

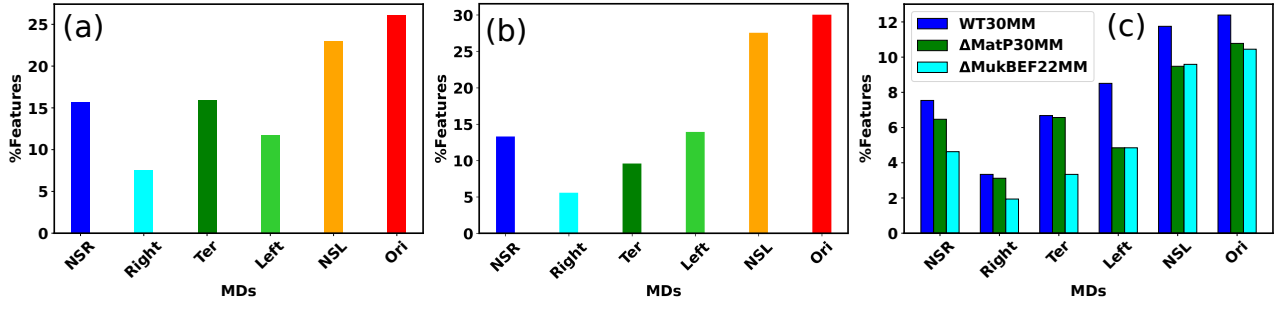

Figure S7: The bar plot of the percentage-wise contributions of *top features* with respect to different macrodomains for  $\Delta$ MatP30MM (a) and  $\Delta$ MukBEF22MM (b) respectively. (c) The comparison of percentage-wise contributions of *top features* with respect to different macrodomains for wild-type and mutant bacteria.

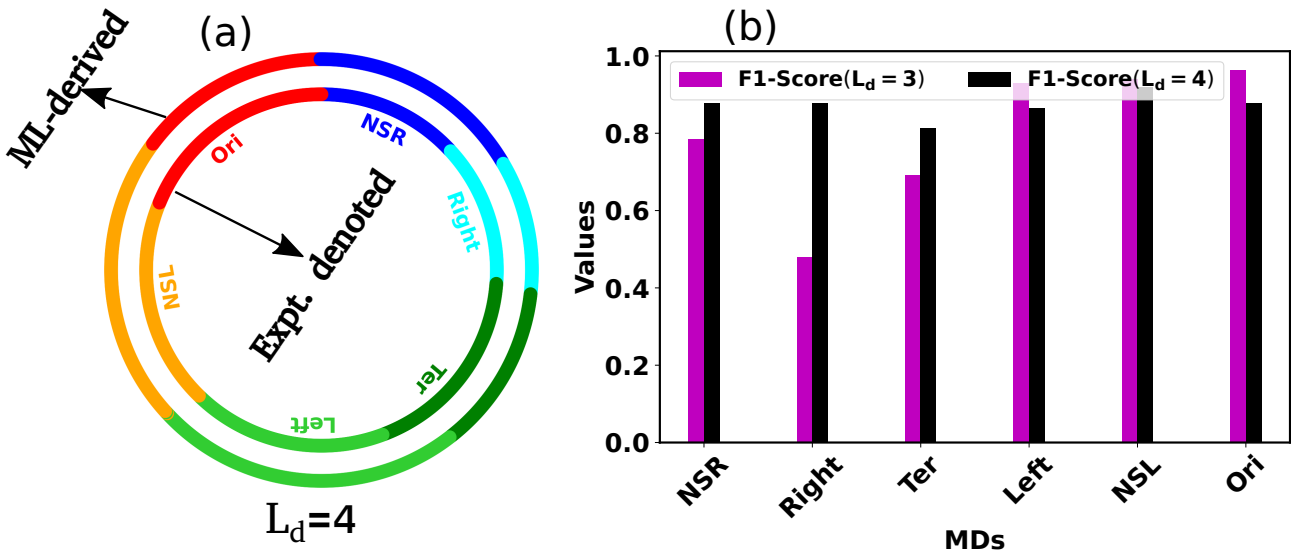

Figure S8: (a) The comparison between experimentally denoted and machine learning (ML)-derived MDs for latent dimension  $L_d = 4$ . (b) respectively. (c) The comparison of the bar plot of the F1-score with respect to different MDs for two latent dimension ( $L_d = 3, 4$ ).

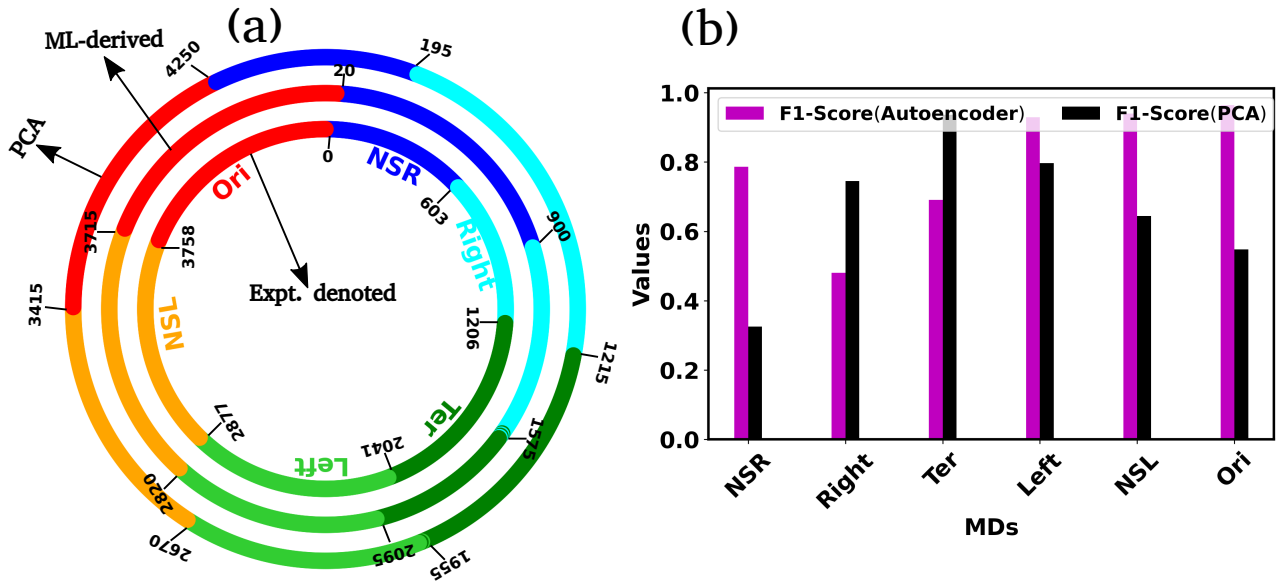

Figure S9: (a) Comparison of experimentally identified macrodomains (MDs) with those derived from principal component analysis (PCA) and machine learning (ML). (b) The comparison of the bar plot of the F1-scores for different MDs using the two techniques (PCA and Autoencoder).

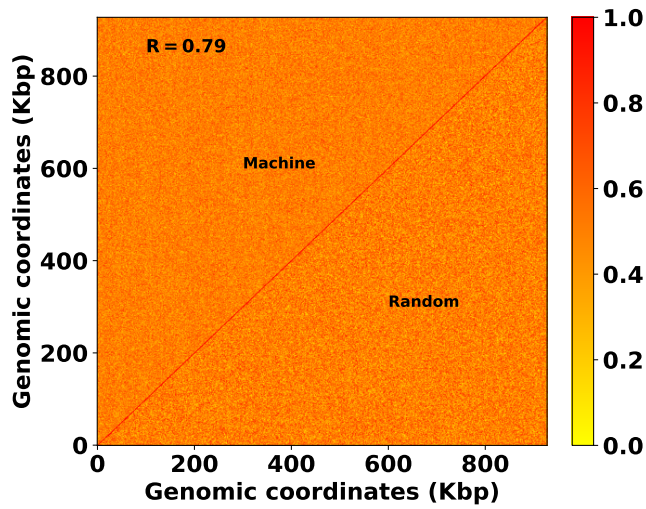

Figure S10: Comparison between the actual random matrix and ML-derived matrix. Here the dimension of the latent space  $L_d = 40$
